# Supplementary material for: Paracetamol and other acetanilide analogs as inter-molecular hydrogen bonding assisted diamagnetic CEST MRI contrast agents
Source: Royal Society of Chemistry journal article supplement (doi:10.1039/d0ra10410h), 2021-01-01
Supplement: d0ra10410h1.pdf [file d0ra10410h1.pdf]

## Electronic Supplementary Information

# Paracetamol and other Acetanilide analogs as inter-molecular hydrogen bonding assisted diamagnetic CEST MRI Contrast Agents

Subhayan Chakraborty<sup>[a]</sup>, S. Peruncheralathan<sup>\*[a]</sup> and Arindam Ghosh<sup>\*[a]</sup>

---

[a] School of Chemical Sciences, National Institute of Science Education and Research ,HBNI, At/PO Jatni, Khurdha 752050 ,Odisha,India

Email: [peru@niser.ac.in](mailto:peru@niser.ac.in), [aringh@niser.ac.in](mailto:aringh@niser.ac.in)

### Table of Content

- **Figures S1-S9:** (a) Overlaid z-spectra for N-phenylacetamide (**1**) with changing saturation power at variable temperature (b) Omega plot for calculation of  $k_{ex}$ .
- **Figures S10-S25:** <sup>1</sup>H and <sup>13</sup>C NMR spectra of compounds **2-9** in DMSO-d<sub>6</sub>.
- **Figures S26-S32:** (a) Overlaid z-spectra of compounds **2-9** at the physiological condition (b) Overlaid z-spectra of **2-9** with changing saturation power (c) Omega plot for calculation of  $k_{ex}$  for compound **2-9**.
- **Figures S33-38:** a) Overlaid z-spectra for N-(4-hydroxyphenyl) acetamide (**9**) with changing saturation power at variable pH ranging from 6.8-8.1 (b) Omega plot for calculation of  $k_{ex}$ .
- **Figure S39:** Overlaid z-spectra for N-(4-hydroxyphenyl) acetamide (**9**) with varying pH ranging from 6.8-8.1.

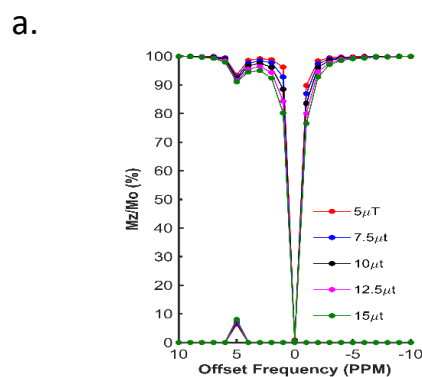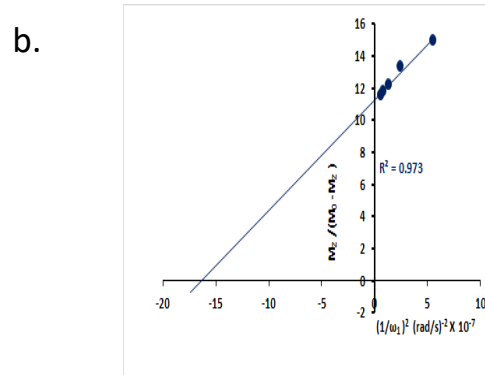

**Figure S1:** (a) Dependence of CEST percentage on saturation field strength ranging from 5  $\mu\text{T}$  to 15  $\mu\text{T}$  for N-phenylacetamide (**1**) at 298K and pH 7.4 (b) Omega plot for exchange rate measurement. The expected linear relationship of  $M_z/(M_0-M_z)$  as a function of  $1/\omega_1^2$  ( $\text{rad/sec})^{-2} \times 10^{-7}$  was obtained when recorded at 16.3 T of 15 mM compound in 0.01M PBS buffer at pH 7.4. RF saturation pulse was applied for 6 s ensuring complete saturation.

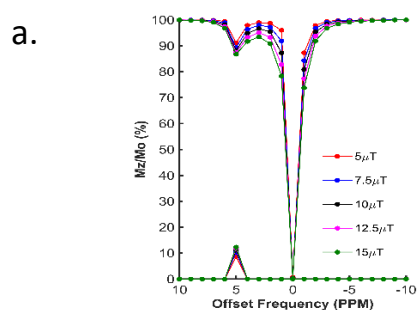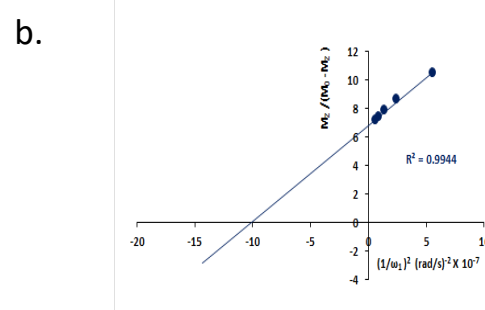

**Figure S2:** (a) Dependence of CEST percentage on saturation field strength ranging from 5  $\mu\text{T}$  to 15  $\mu\text{T}$  for N-phenylacetamide (**1**) at 303K and pH 7.4 (b) Omega plot for exchange rate measurement. The expected linear relationship of  $M_z/(M_0-M_z)$  as a function of  $1/\omega_1^2$  ( $\text{rad/sec})^{-2} \times 10^{-7}$  was obtained when recorded at 16.3 T of 15 mM compound in 0.01M PBS buffer at pH 7.4. RF saturation pulse was applied for 6 s ensuring complete saturation.

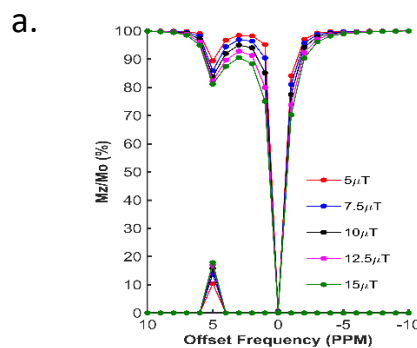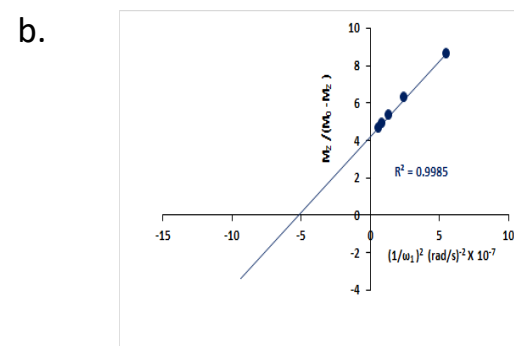

**Figure S3:** (a) Dependence of CEST percentage on saturation field strength ranging from 5  $\mu\text{T}$  to 15  $\mu\text{T}$  for N-phenylacetamide (**1**) at 308K and pH 7.4 (b) Omega plot for exchange rate measurement. The expected linear relationship of  $M_z/(M_0-M_z)$  as a function of  $1/\omega_1^2$  ( $\text{rad/sec})^{-2} \times 10^{-7}$  was obtained when recorded at 16.3 T of 15 mM compound in 0.01M PBS buffer at pH 7.4. RF saturation pulse was applied for 6 s ensuring complete saturation.

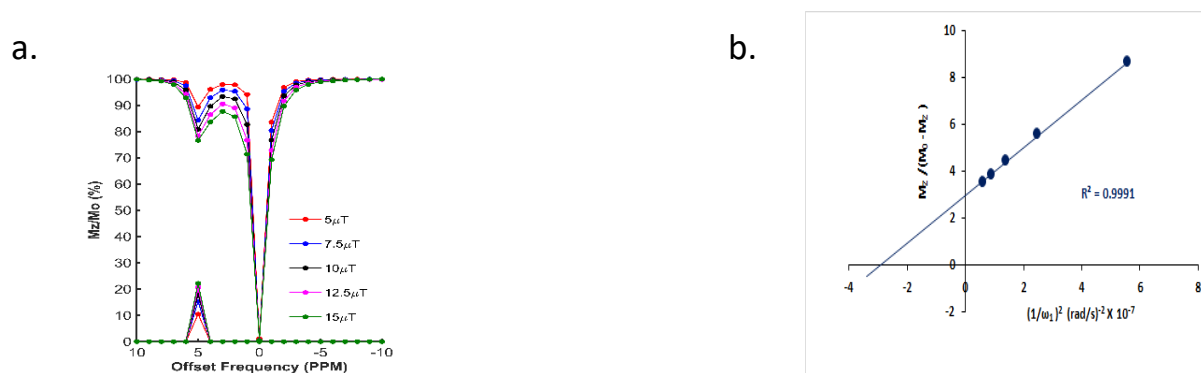

**Figure S4:** (a) Dependence of CEST percentage on saturation field strength ranging from 5  $\mu$ T to 15  $\mu$ T for N-phenylacetamide (**1**) at 310K (b) Omega plot for exchange rate measurement. The expected linear relationship of  $M_z/(M_0 - M_z)$  as a function of  $1/\omega_1^2$  (rad/sec)<sup>-2</sup>  $\times 10^{-7}$  was obtained when recorded at 16.3 T of 15 mM compound in 0.01M PBS buffer at pH 7.4. RF saturation pulse was applied for 6 s ensuring complete saturation.

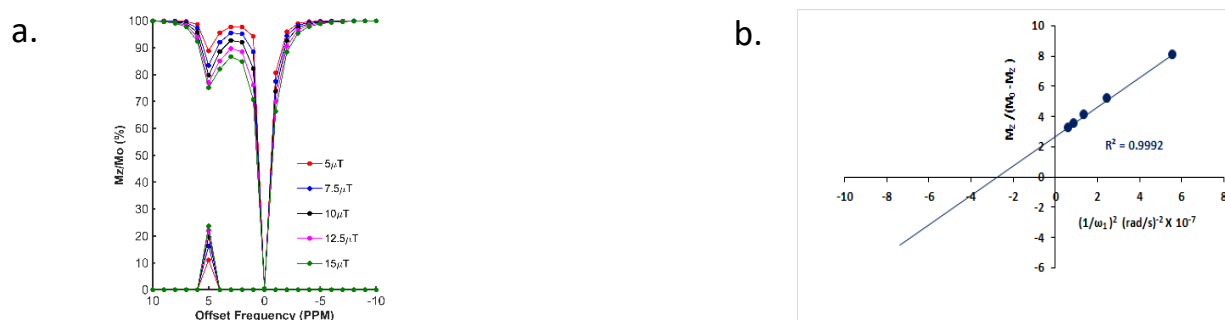

**Figure S5:** (a) Dependence of CEST percentage on saturation field strength ranging from 5  $\mu$ T to 15  $\mu$ T for N-phenylacetamide (**1**) at 313K and pH 7.4 (b) Omega plot for exchange rate measurement. The expected linear relationship of  $M_z/(M_0 - M_z)$  as a function of  $1/\omega_1^2$  (rad/sec)<sup>-2</sup>  $\times 10^{-7}$  was obtained when recorded at 16.3 T of 15 mM compound in 0.01M PBS buffer at pH 7.4. RF saturation pulse was applied for 6 s ensuring complete saturation.

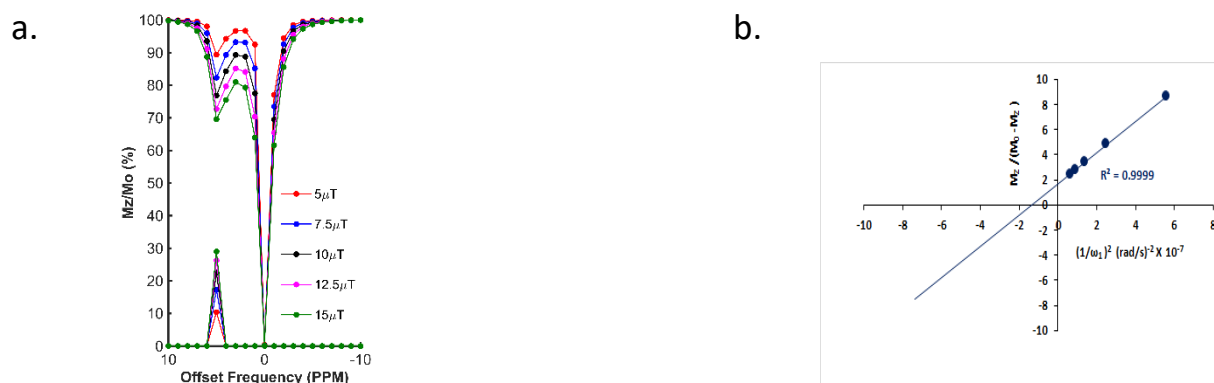

**Figure S6:** (a) Dependence of CEST percentage on saturation field strength ranging from 5  $\mu$ T to 15  $\mu$ T for N-phenylacetamide (**1**) at 318K and pH 7.4 (b) Omega plot for exchange rate measurement. The expected linear relationship of  $M_z/(M_0 - M_z)$  as a function of  $1/\omega_1^2$  (rad/sec)<sup>-2</sup>  $\times 10^{-7}$  was obtained when recorded at 16.3 T of 15 mM compound in 0.01M PBS buffer at pH 7.4. RF saturation pulse was applied for 6 s ensuring complete saturation.

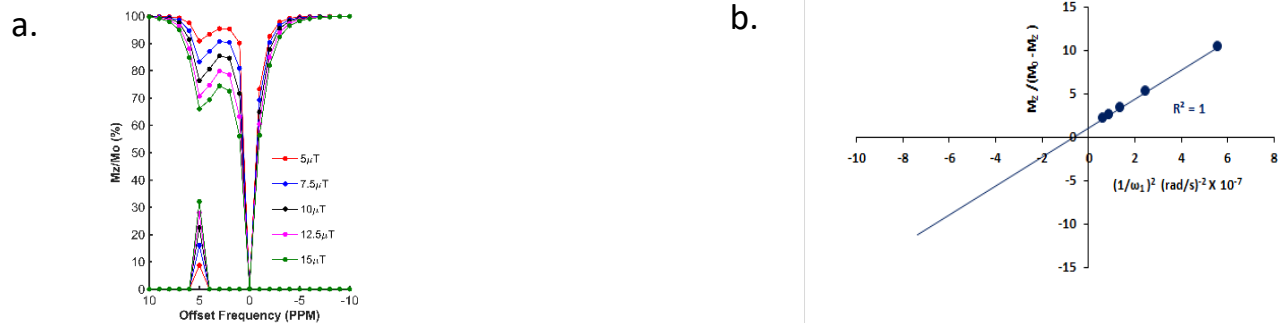

**Figure S7:** (a) Dependence of CEST percentage on saturation field strength ranging from 5 μT to 15 μT for N-phenylacetamide (**1**) at 323K and pH 7.4 (b) Omega plot for exchange rate measurement. The expected linear relationship of  $M_z/(M_0-M_z)$  as a function of  $1/\omega_1^2$  (rad/sec)<sup>-2</sup> × 10<sup>-7</sup> was obtained when recorded at 16.3 T of 15 mM compound in 0.01M PBS buffer at pH 7.4. RF saturation pulse was applied for 6 s ensuring complete saturation.

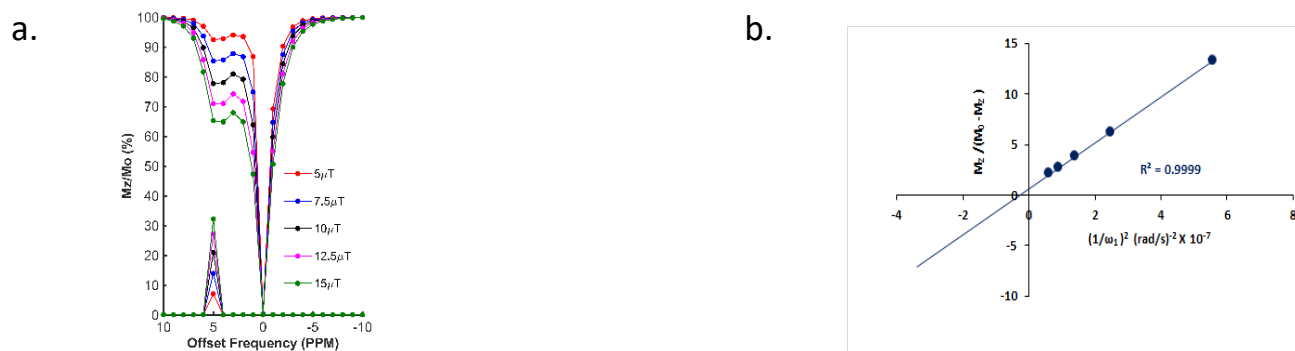

**Figure S8:** (a) Dependence of CEST percentage on saturation field strength ranging from 5 μT to 15 μT for N-phenylacetamide (**1**) at 328K and pH 7.4 (b) Omega plot for exchange rate measurement. The expected linear relationship of  $M_z/(M_0-M_z)$  as a function of  $1/\omega_1^2$  (rad/sec)<sup>-2</sup> × 10<sup>-7</sup> was obtained when recorded at 16.3 T of 15 mM compound in 0.01M PBS buffer at pH 7.4. RF saturation pulse was applied for 6 s ensuring complete saturation.

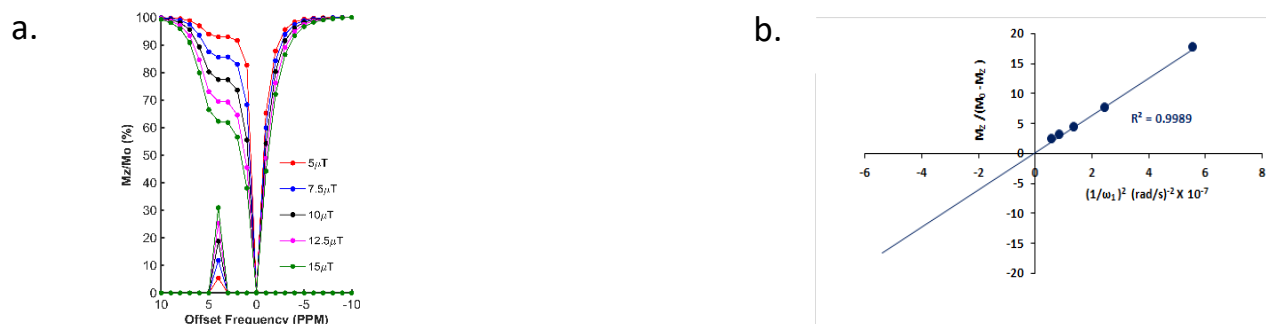

**Figure S9:** (a) Dependence of CEST percentage on saturation field strength ranging from 5 μT to 15 μT for N-phenylacetamide (**1**) at 333K and pH 7.4 (b) Omega plot for exchange rate measurement. The expected linear relationship of  $M_z/(M_0-M_z)$  as a function of  $1/\omega_1^2$  (rad/sec)<sup>-2</sup> × 10<sup>-7</sup> was obtained when recorded at 16.3 T of 15 mM compound in 0.01M PBS buffer at pH 7.4. RF saturation pulse was applied for 6 s ensuring complete saturation.

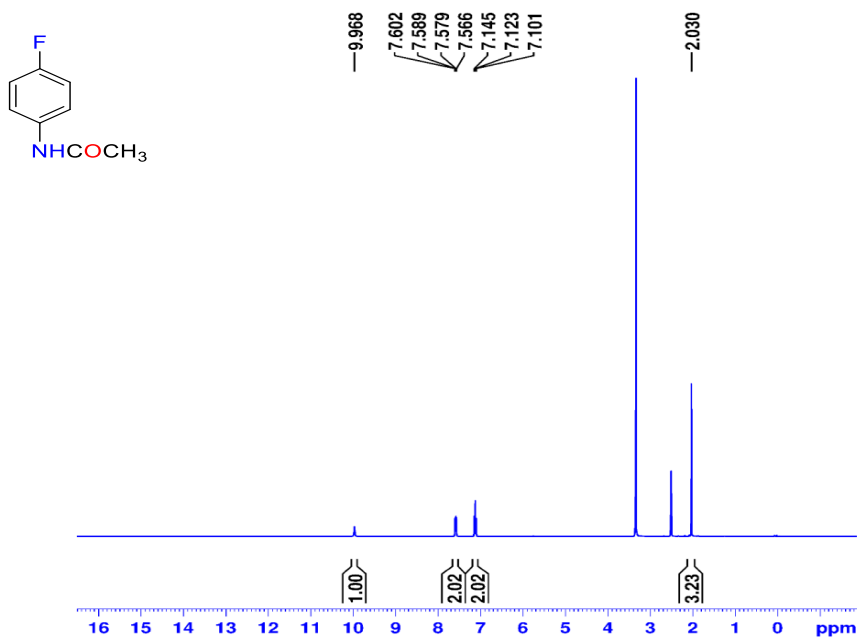

Figure S10: <sup>1</sup>H-NMR spectrum of *N*-(4-fluorophenyl)acetamide (**2**) in DMSO-d<sub>6</sub> at 298K.

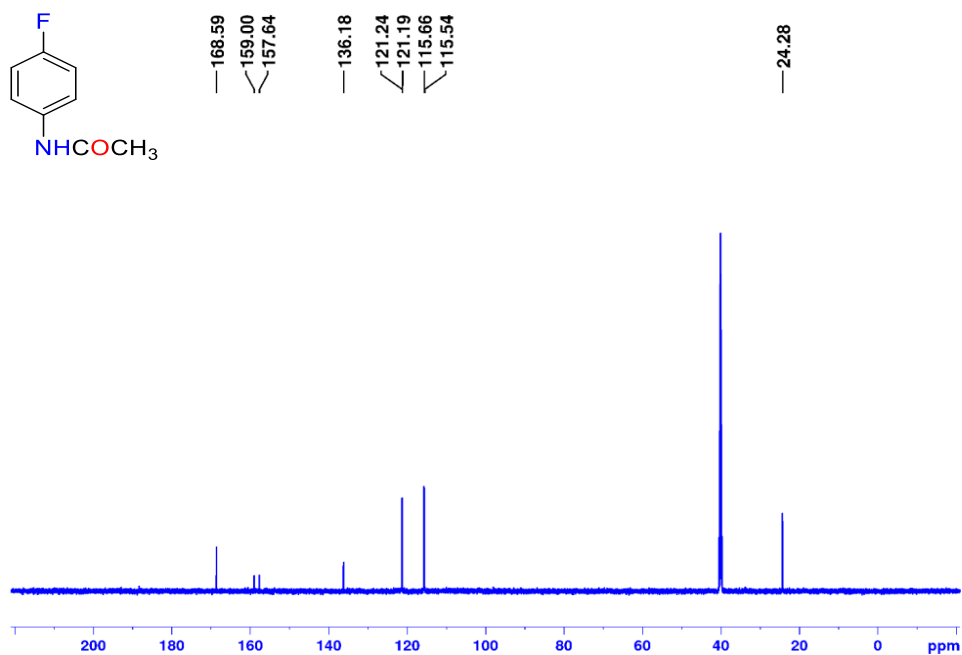

Figure S11: <sup>13</sup>C NMR spectrum of *N*-(4-fluorophenyl)acetamide (**2**) in DMSO-d<sub>6</sub> at 298K.

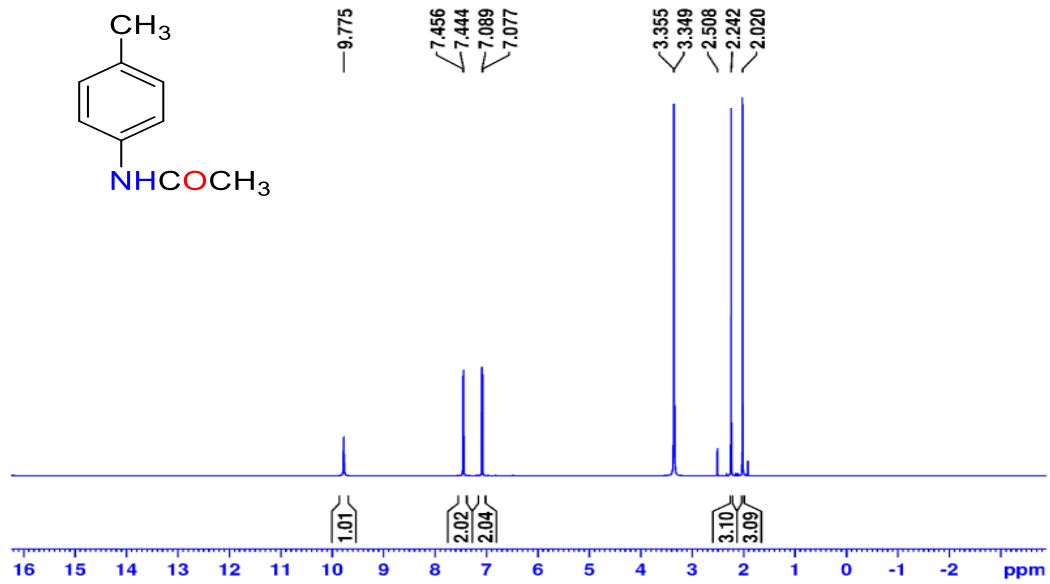

Figure S12: <sup>1</sup>H-NMR spectrum of *N*-(*p*-tolyl)acetamide (**3**) in DMSO-d<sub>6</sub> at 298K.

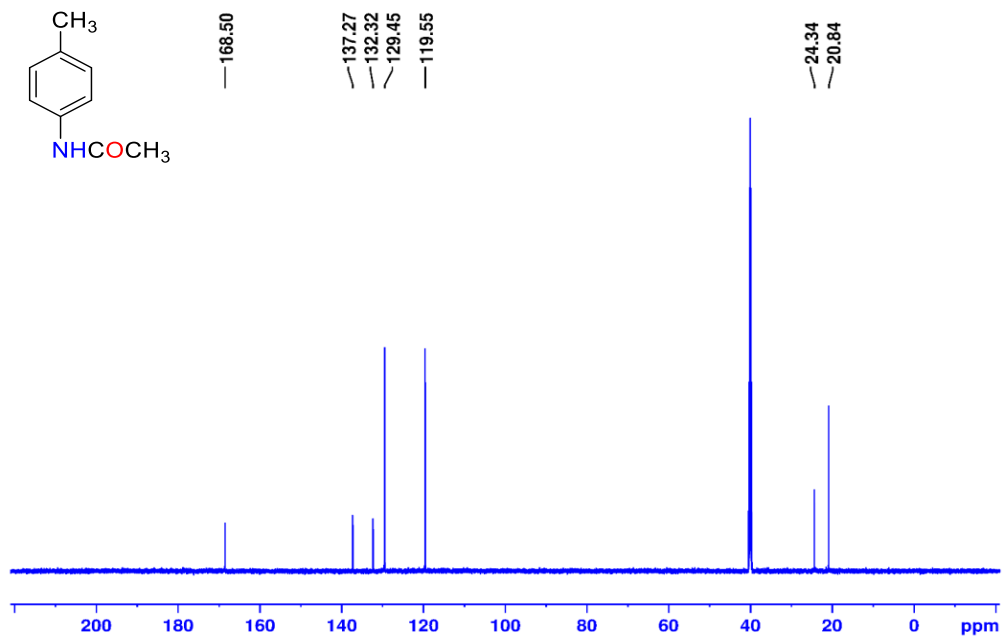

Figure S13: <sup>13</sup>C NMR spectrum of *N*-(*p*-tolyl)acetamide (**3**) in DMSO-d<sub>6</sub> at 298K.

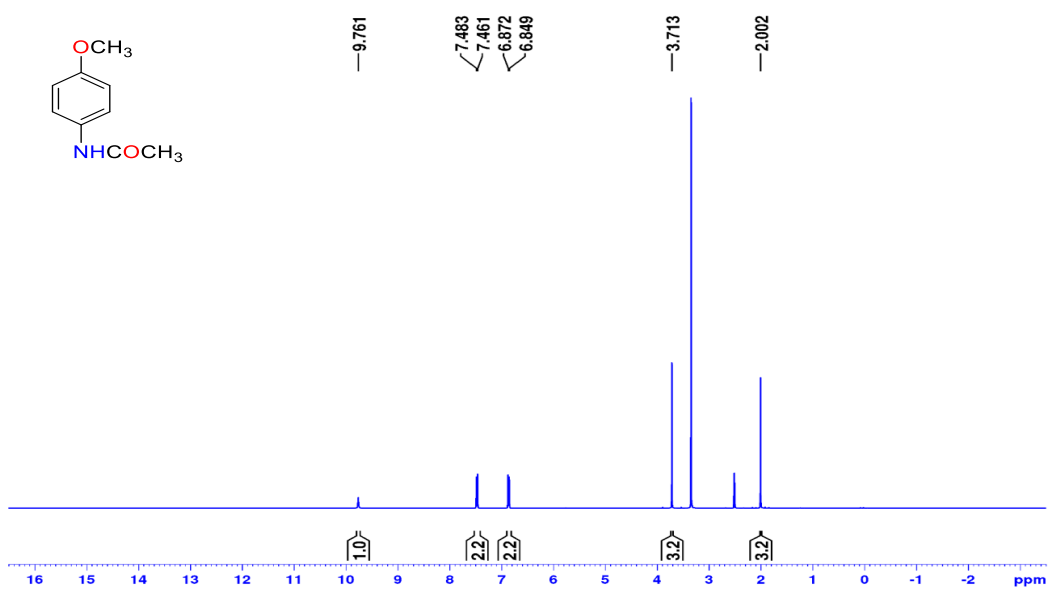

Figure S14: <sup>1</sup>H-NMR spectrum of N-(4-methoxyphenyl)acetamide (**4**) in DMSO-d<sub>6</sub> at 298K.

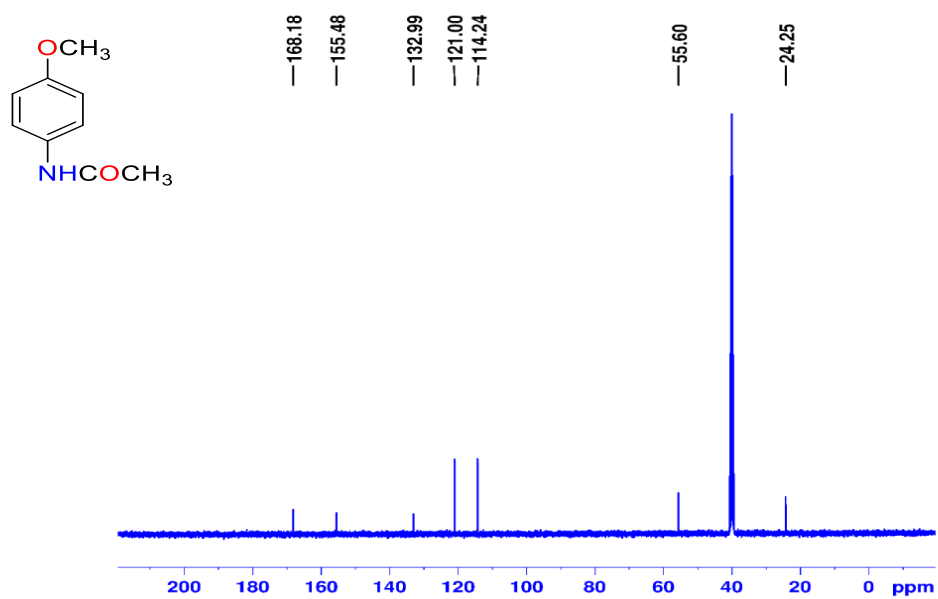

Figure S15: <sup>13</sup>C NMR spectrum of N-(4-methoxyphenyl)acetamide (**4**) in DMSO-d<sub>6</sub> at 298K.

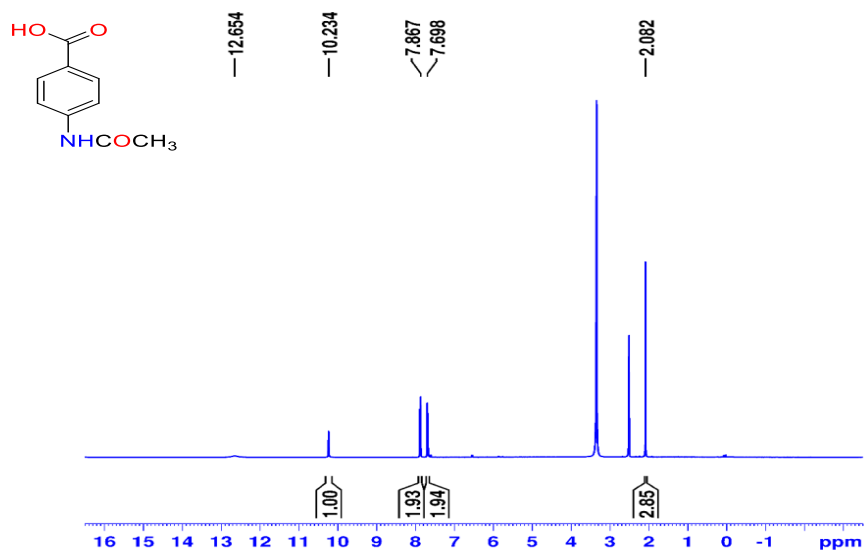

Figure S16: <sup>1</sup>H-NMR spectrum of 4-acetamidobenzoic acid (**5**) in DMSO-d<sub>6</sub> at 298K.

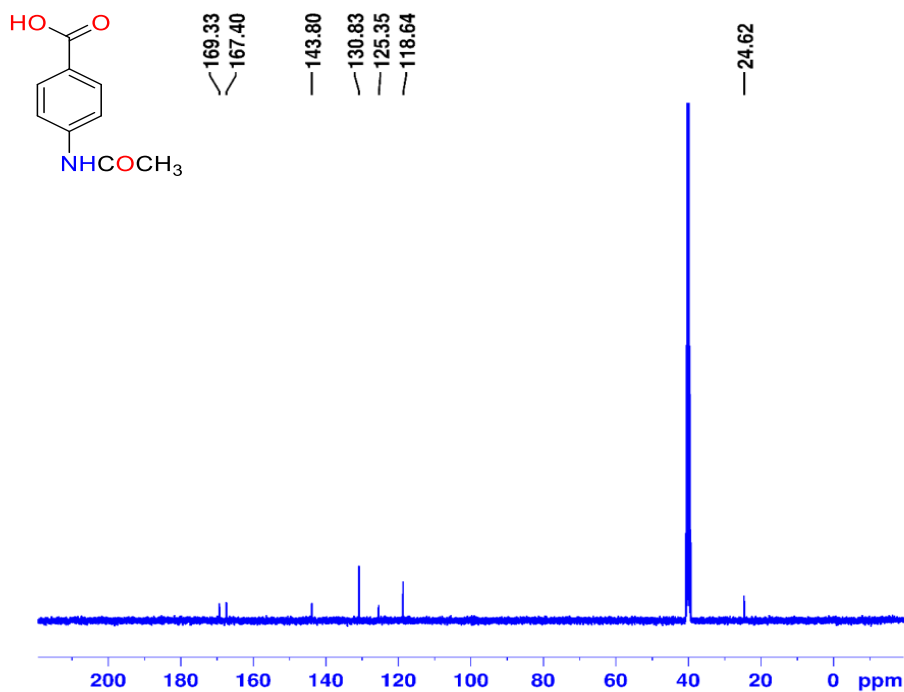

Figure S17: <sup>13</sup>C NMR spectrum of 4-acetamidobenzoic acid (**5**) in DMSO-d<sub>6</sub> at 298K.



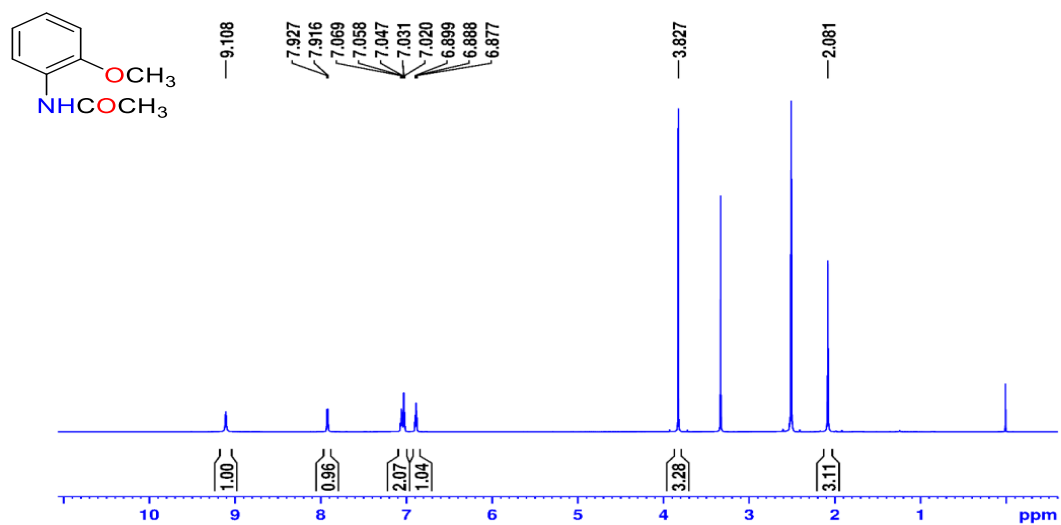

Figure S18: <sup>1</sup>H-NMR spectrum of N-(2-methoxyphenyl) acetamide (6) in DMSO-d<sub>6</sub> at 298K.

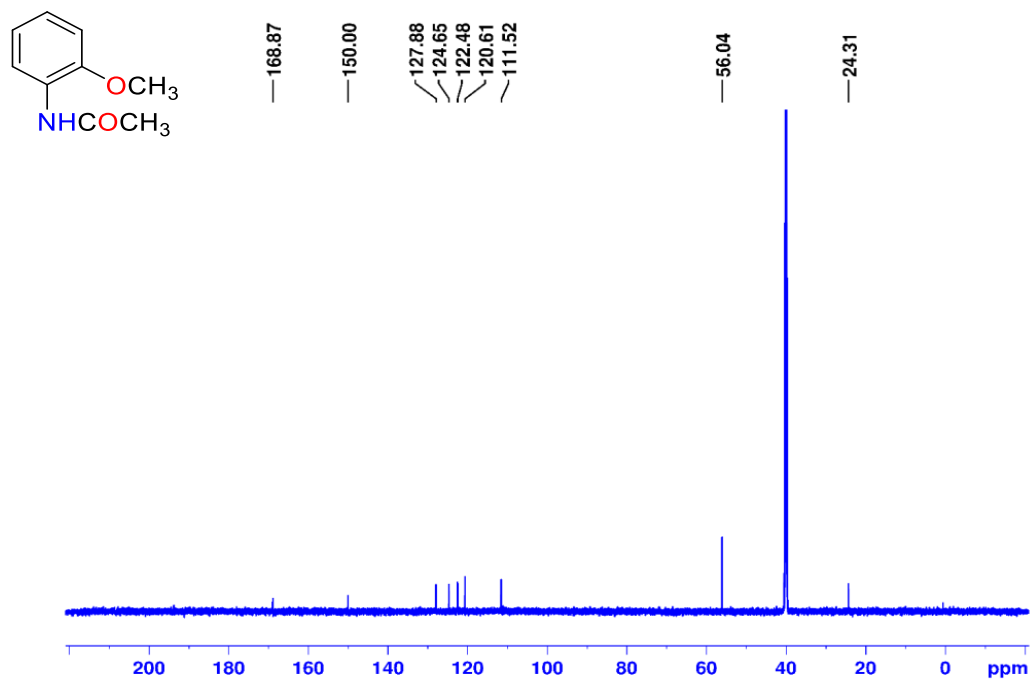

Figure S19: <sup>13</sup>C NMR spectrum of N-(2-methoxyphenyl) acetamide (6) in DMSO-d<sub>6</sub> at 298K.

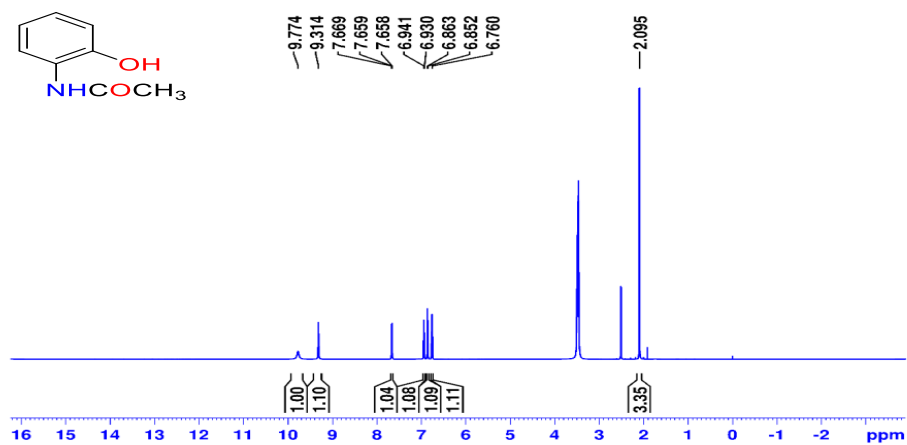

Figure S20: <sup>1</sup>H-NMR spectrum of N-(2-hydroxyphenyl)acetamide (7) in DMSO-d<sub>6</sub> at 298K.

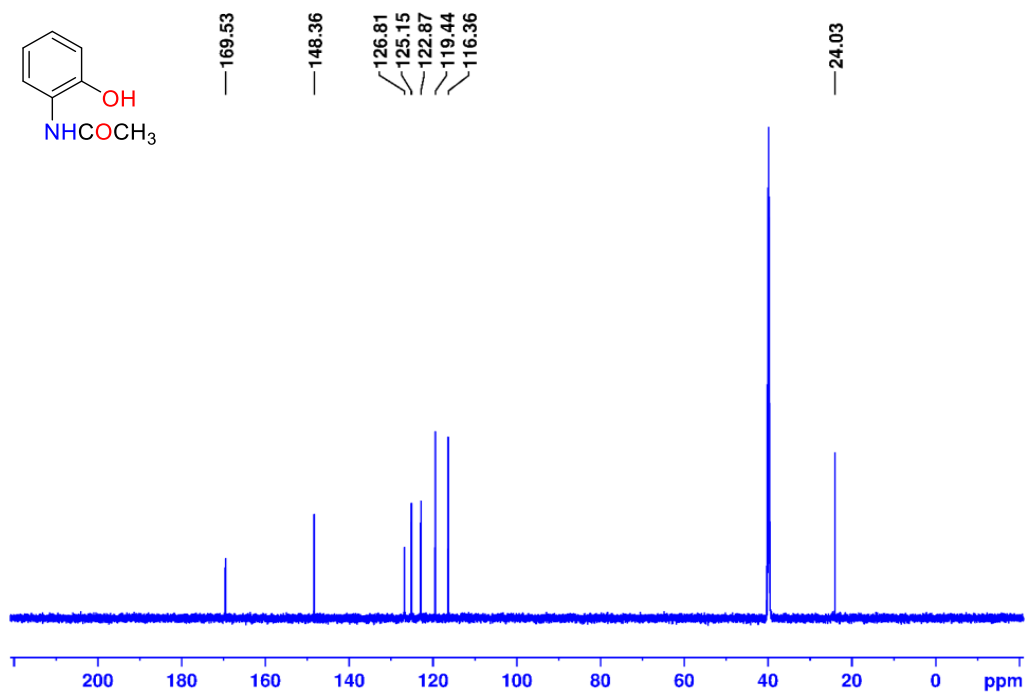

Figure S21: <sup>13</sup>C NMR spectrum of N-(2-hydroxyphenyl)acetamide (7) in DMSO-d<sub>6</sub> at 298K.

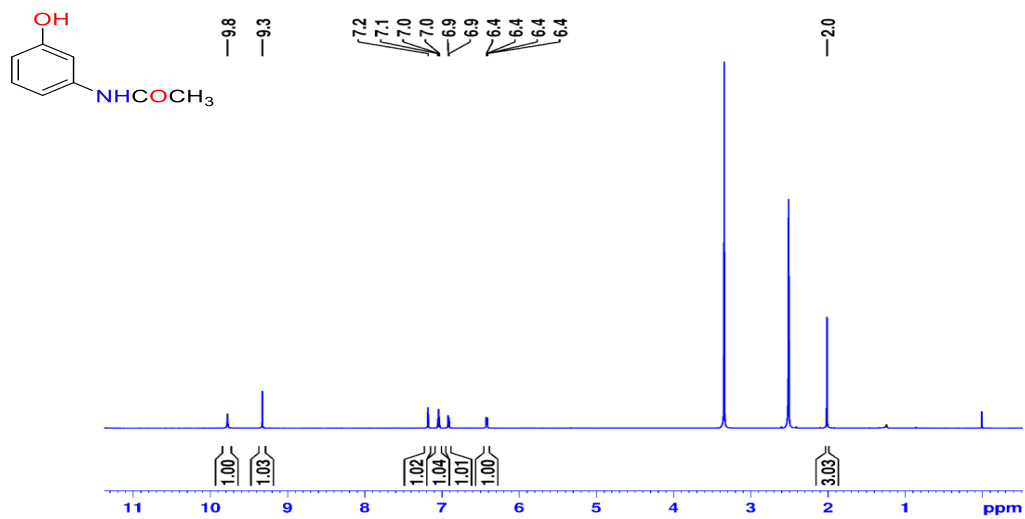

Figure S22: <sup>1</sup>H-NMR spectrum of N-(3-hydroxyphenyl) acetamide (**8**) in DMSO-d<sub>6</sub> at 298K.

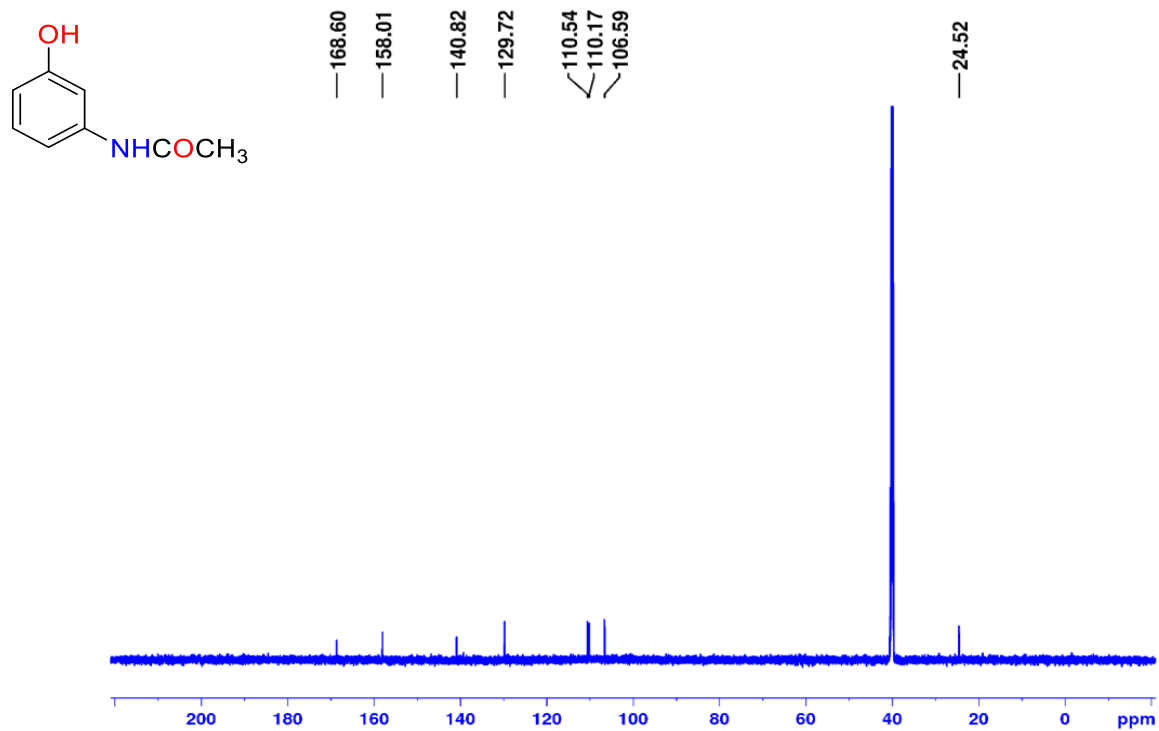

Figure S23: <sup>13</sup>C-NMR spectrum of N-(3-hydroxyphenyl) acetamide (**8**) in DMSO-d<sub>6</sub> at 298K.

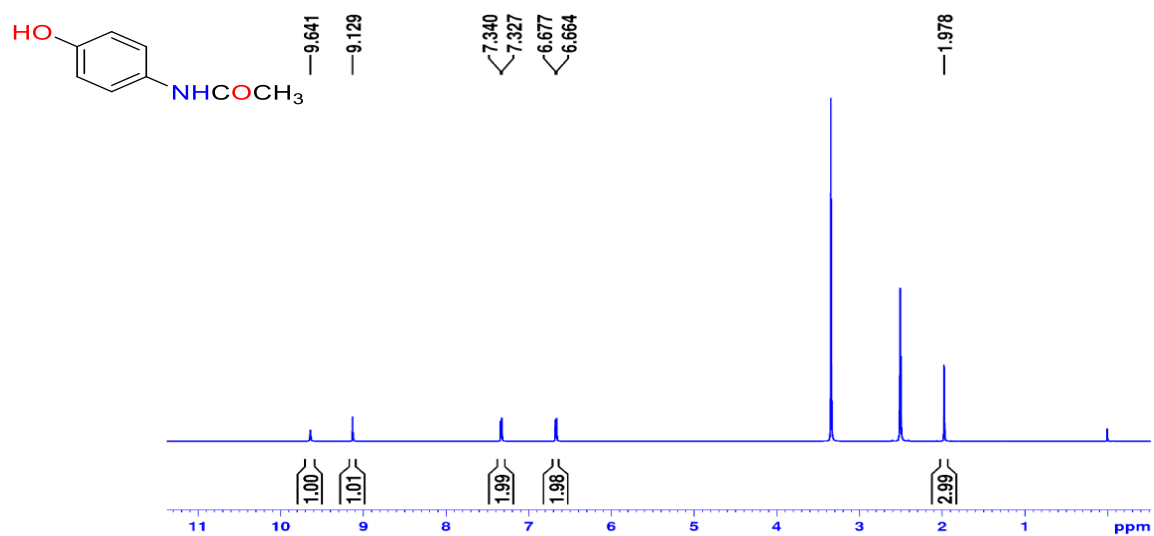

Figure S24: <sup>1</sup>H-NMR spectrum of N-(4-hydroxyphenyl) acetamide (**9**) in DMSO-d<sub>6</sub> at 298K.

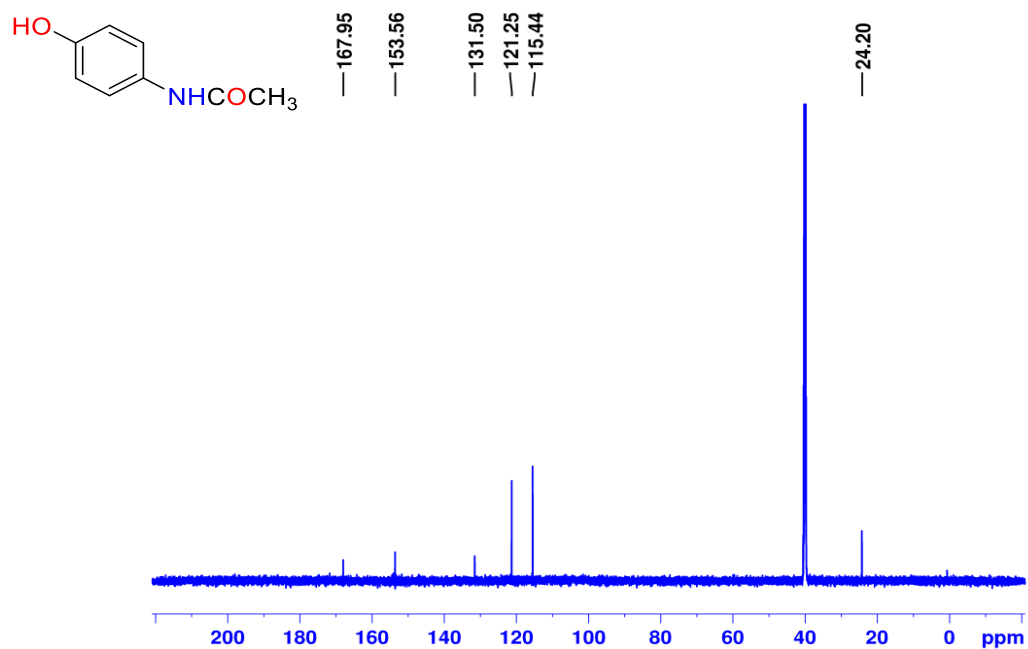

Figure S25: <sup>13</sup>C NMR spectrum of N-(4-hydroxyphenyl) acetamide (**9**) in DMSO-d<sub>6</sub> at 298K.

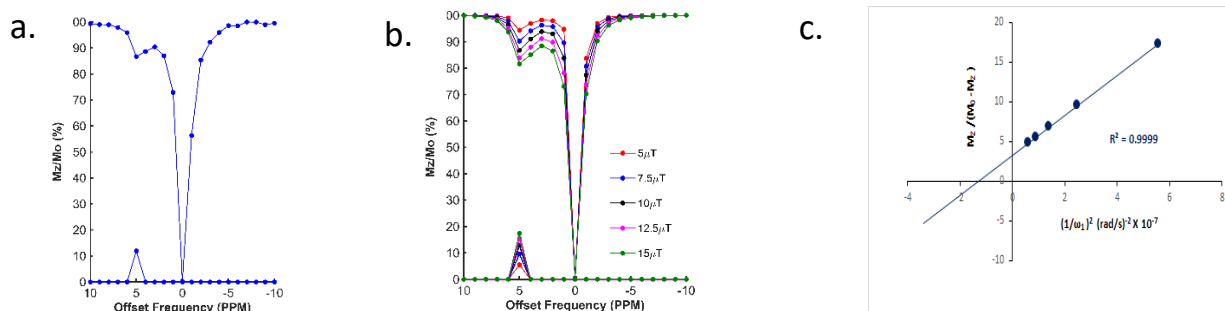

**Figure S26:** (a) z-spectra of 15mM *N*-(4-fluorophenyl)acetamide (**2**) at 310K and at pH 7.4 recorded at 9.3T (b) Dependence of CEST percentage on saturation field strength ranging from 5 $\mu$ T to 15 $\mu$ T for (**2**) (c) Omega plot for exchange rate measurement. The expected linear relationship of  $M_z/(M_0-M_z)$  as a function of  $1/\omega_1^2$  (rad/sec) $^{-2} \times 10^{-7}$  was obtained when recorded at 16.3 T of 15 mM compound in 0.01M PBS buffer at pH 7.4. RF saturation pulse was applied for 6 s ensuring complete saturation.

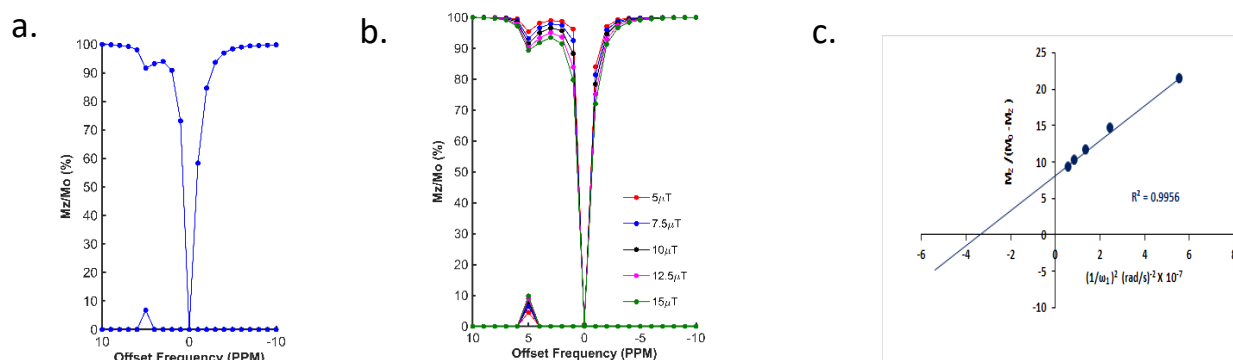

**Figure S27:** (a) z-spectra of 15mM *N*-(p-tolyl)acetamide (**3**) at 310K and at pH 7.4 recorded at 9.3T (b) Dependence of CEST percentage on saturation field strength ranging from 5  $\mu$ T to 15  $\mu$ T for (**3**) (c) Omega plot for exchange rate measurement. The expected linear relationship of  $M_z/(M_0-M_z)$  as a function of  $1/\omega_1^2$  (rad/sec) $^{-2} \times 10^{-7}$  was obtained when recorded at 16.3 T of 15 mM compound in 0.01M PBS buffer at pH 7.4. RF saturation pulse was applied for 6 s ensuring complete saturation.

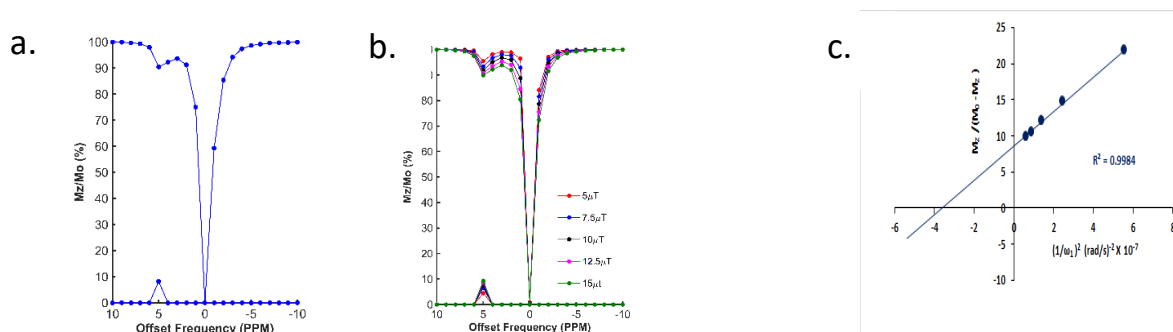

**Figure S28:** (a) z-spectra of 15mM *N*-(4-methoxyphenyl)acetamide (**4**) at 310K and at pH 7.4 recorded at 9.3T (b) Dependence of CEST percentage on saturation field strength ranging from 5  $\mu$ T to 15  $\mu$ T for (**4**) (c) Omega plot for exchange rate measurement. The expected linear relationship of  $M_z/(M_0-M_z)$  as a function of  $1/\omega_1^2$  (rad/sec) $^{-2} \times 10^{-7}$  was obtained when recorded at 16.3 T of 15 mM compound in 0.01M PBS buffer at pH 7.4. RF saturation pulse was applied for 6 s ensuring complete saturation.

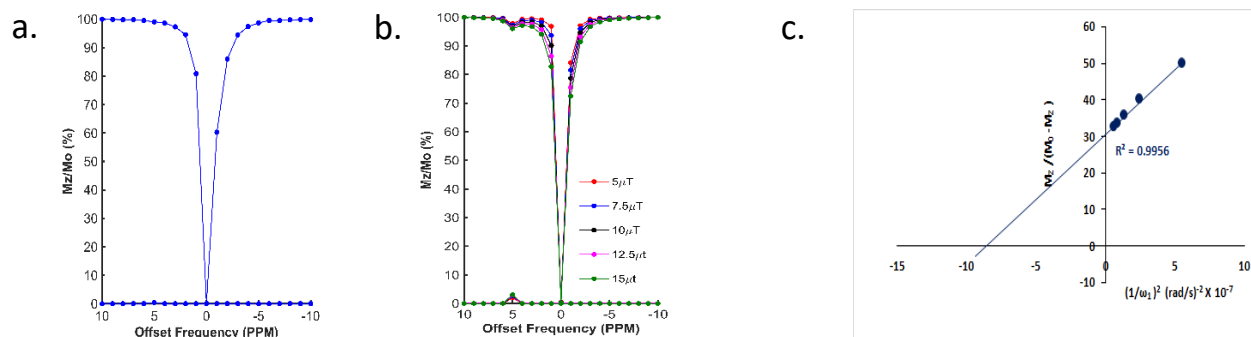

**Figure S29:** (a) z-spectra of 15mM 4-acetamidobenzoic acid (**5**) at 310K and at pH 7.4 recorded at 9.3T (b) Dependence of CEST percentage on saturation field strength ranging from 5  $\mu$ T to 15  $\mu$ T for (**5**) (c) Omega plot for exchange rate measurement. The expected linear relationship of  $M_z/(M_0-M_z)$  as a function of  $1/\omega_1^2$  (rad/sec) $^{-2} \times 10^{-7}$  was obtained when recorded at 16.3 T of 15 mM compound in 0.01M PBS buffer at pH 7.4. RF saturation pulse was applied for 6 s ensuring complete saturation.

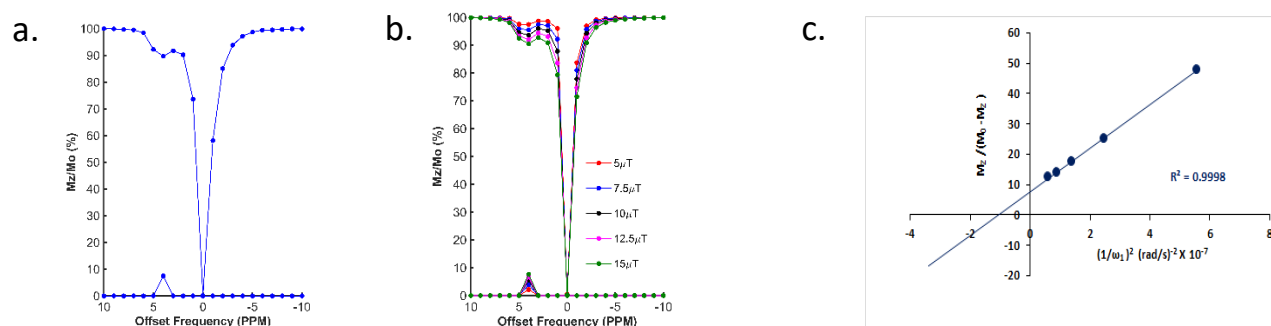

**Figure S30:** (a) z-spectra of 15mM N-(2-methoxyphenyl)acetamide (**6**) at 310K and at pH 7.4 recorded at 9.3T (b) Dependence of CEST percentage on saturation field strength ranging from 5  $\mu$ T to 15  $\mu$ T for (**6**) (c) Omega plot for exchange rate measurement. The expected linear relationship of  $M_z/(M_0-M_z)$  as a function of  $1/\omega_1^2$  (rad/sec) $^{-2} \times 10^{-7}$  was obtained when recorded at 16.3 T of 15 mM compound in 0.01M PBS buffer at pH 7.4. RF saturation pulse was applied for 6 s ensuring complete saturation.

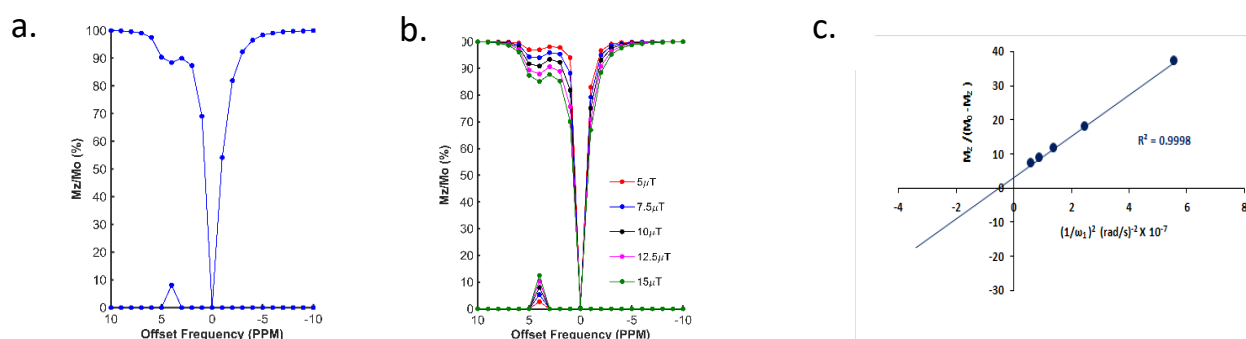

**Figure S31:** (a) z-spectra of 15mM N-(2-hydroxyphenyl)acetamide (**7**) at 310K and at pH 7.4 recorded at 9.3T (b) Dependence of CEST percentage on saturation field strength ranging from 5  $\mu$ T to 15  $\mu$ T for (**7**) (c) Omega plot for exchange rate measurement. The expected linear relationship of  $M_z/(M_0-M_z)$  as a function of  $1/\omega_1^2$  (rad/sec) $^{-2} \times 10^{-7}$  was obtained when recorded at 16.3 T of 15 mM compound in 0.01M PBS buffer at pH 7.4. RF saturation pulse was applied for 6 s ensuring complete saturation.

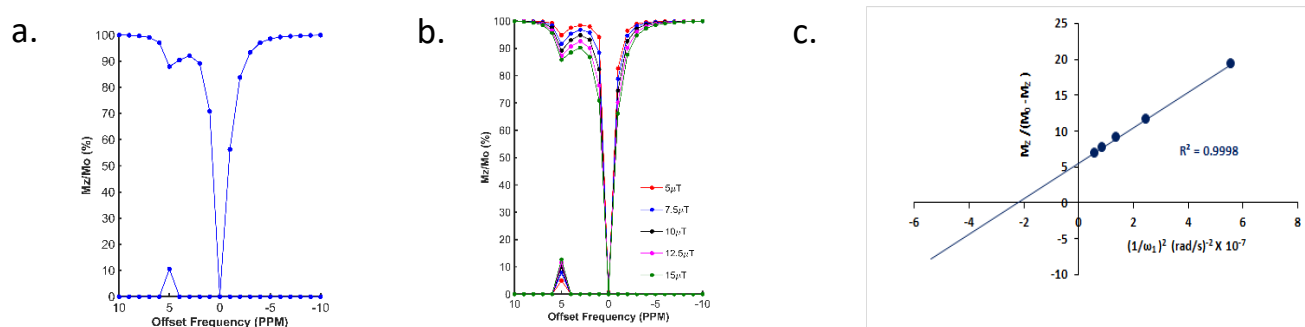

**Figure S32:** (a) z-spectra of 15mM N-(3-hydroxyphenyl)acetamide (**8**) at 310K and at pH 7.4 recorded at 9.3T (b) Dependence of CEST percentage on saturation field strength ranging from 5  $\mu$ T to 15  $\mu$ T for (**8**) (c) Omega plot for exchange rate measurement. The expected linear relationship of  $M_z/(M_0-M_z)$  as a function of  $1/\omega_1^2$  (rad/sec) $^{-2} \times 10^{-7}$  was obtained when recorded at 16.3 T of 15 mM compound in 0.01M PBS buffer at pH 7.4. RF saturation pulse was applied for 6 s ensuring complete saturation.

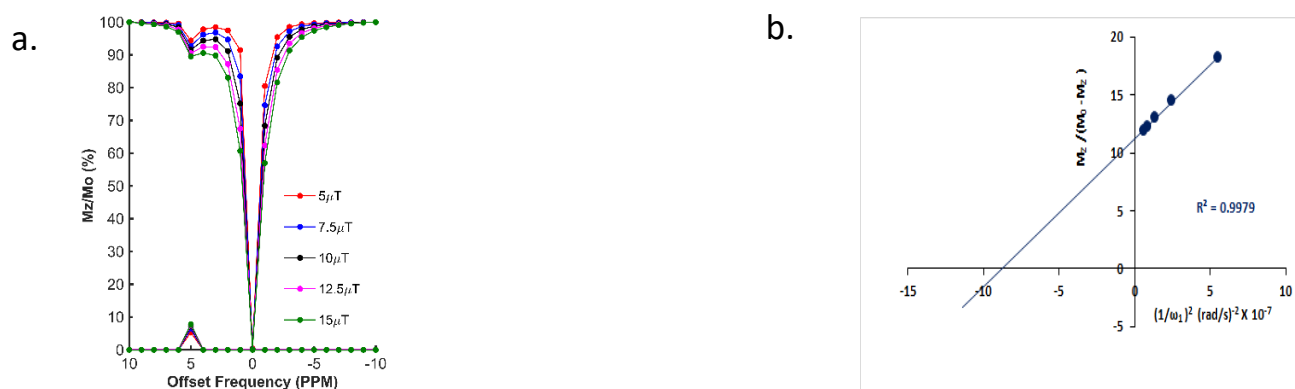

**Figure S33:** (a) Dependence of CEST percentage on saturation field strength ranging from 5  $\mu$ T to 15  $\mu$ T for N-(4-hydroxyphenyl) acetamide (**9**) at pH 6.8. (b) Omega plot for exchange rate measurement. The expected linear relationship of  $M_z/(M_0-M_z)$  as a function of  $1/\omega_1^2$  (rad/sec) $^{-2} \times 10^{-7}$  was obtained when recorded at 16.3 T of 15 mM compound in 0.01M PBS buffer. RF saturation pulse was applied for 6 s ensuring complete saturation.

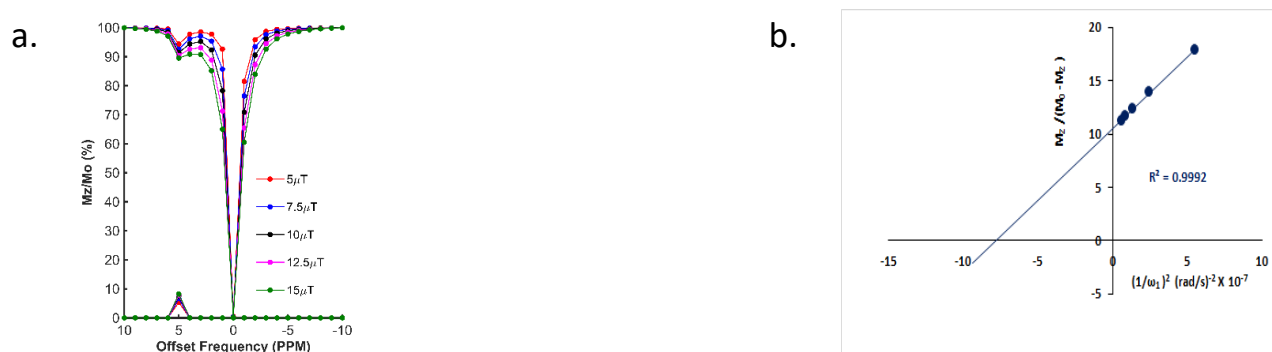

**Figure S34:** (a) Dependence of CEST percentage on saturation field strength ranging from 5  $\mu$ T to 15  $\mu$ T for N-(4-hydroxyphenyl) acetamide (**9**) at pH 7.0. (b) Omega plot for exchange rate measurement. The expected linear relationship of  $M_z/(M_0-M_z)$  as a function of  $1/\omega_1^2$  (rad/sec) $^{-2} \times 10^{-7}$  was obtained when recorded at 16.3 T of 15 mM compound in 0.01M PBS buffer. RF saturation pulse was applied for 6 s ensuring complete saturation.

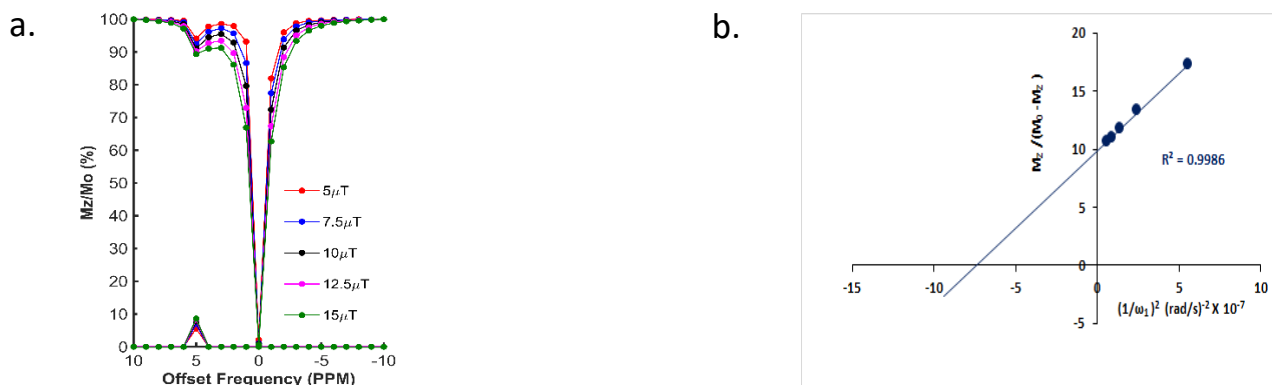

**Figure S35:** (a) Dependence of CEST percentage on saturation field strength ranging from 5  $\mu\text{T}$  to 15  $\mu\text{T}$  for N-(4-hydroxyphenyl) acetamide (**9**) at pH 7.2 (b) Omega plot for exchange rate measurement. The expected linear relationship of  $M_z/(M_0 - M_z)$  as a function of  $1/\omega_1^2$  (rad/sec) $^{-2} \times 10^{-7}$  was obtained when recorded at 16.3 T of 15 mM compound in 0.01M PBS buffer. RF saturation pulse was applied for 6 s ensuring complete saturation.

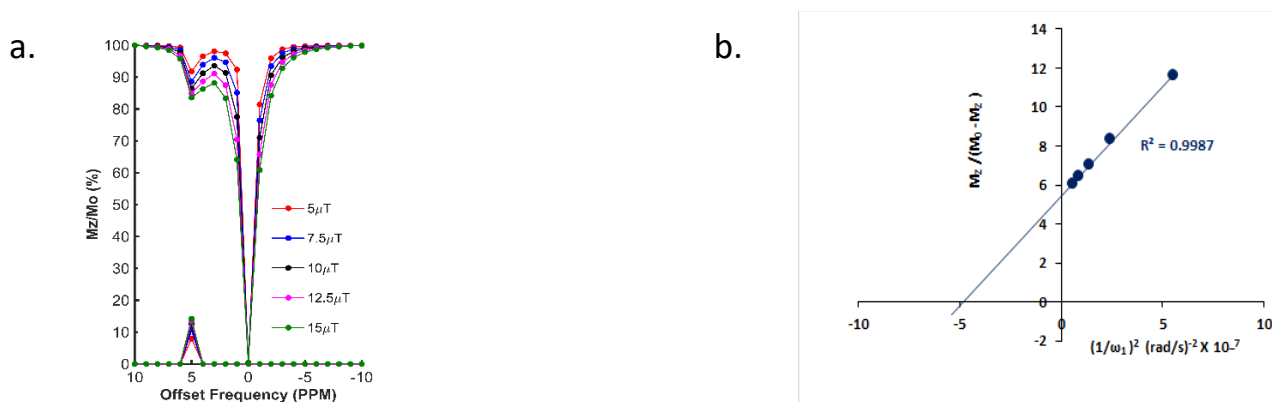

**Figure S36:** (a) Dependence of CEST percentage on saturation field strength ranging from 5  $\mu\text{T}$  to 15  $\mu\text{T}$  for N-(4-hydroxyphenyl) acetamide (**9**) at pH 7.6 (b) Omega plot for exchange rate measurement. The expected linear relationship of  $M_z/(M_0 - M_z)$  as a function of  $1/\omega_1^2$  (rad/sec) $^{-2} \times 10^{-7}$  was obtained when recorded at 16.3 T of 15 mM compound in 0.01M PBS buffer. RF saturation pulse was applied for 6 s ensuring complete saturation.

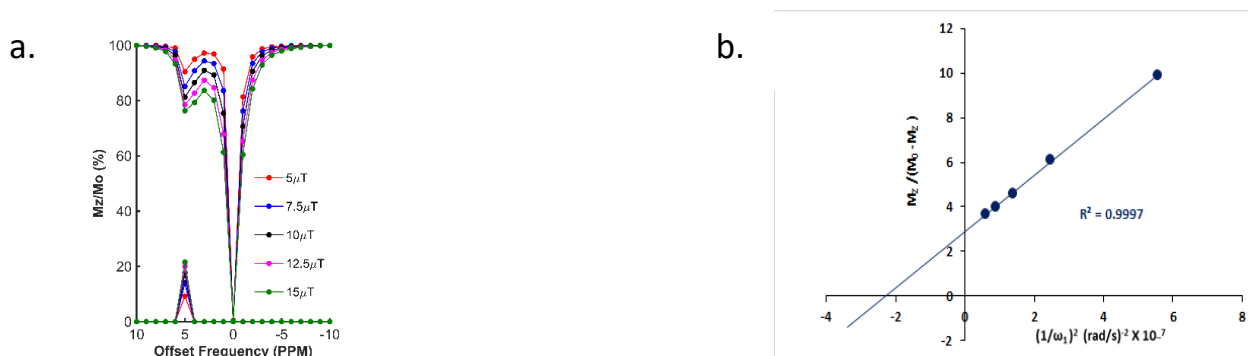

**Figure S37:** (a) Dependence of CEST percentage on saturation field strength ranging from 5  $\mu\text{T}$  to 15  $\mu\text{T}$  for N-(4-hydroxyphenyl) acetamide (**9**) at pH 7.9 (b) Omega plot for exchange rate measurement. The expected linear relationship of  $M_z/(M_0 - M_z)$  as a function of  $1/\omega_1^2$  (rad/sec) $^{-2} \times 10^{-7}$  was obtained when recorded at 16.3 T of 15 mM compound in 0.01M PBS buffer. RF saturation pulse was applied for 6 s ensuring complete saturation.



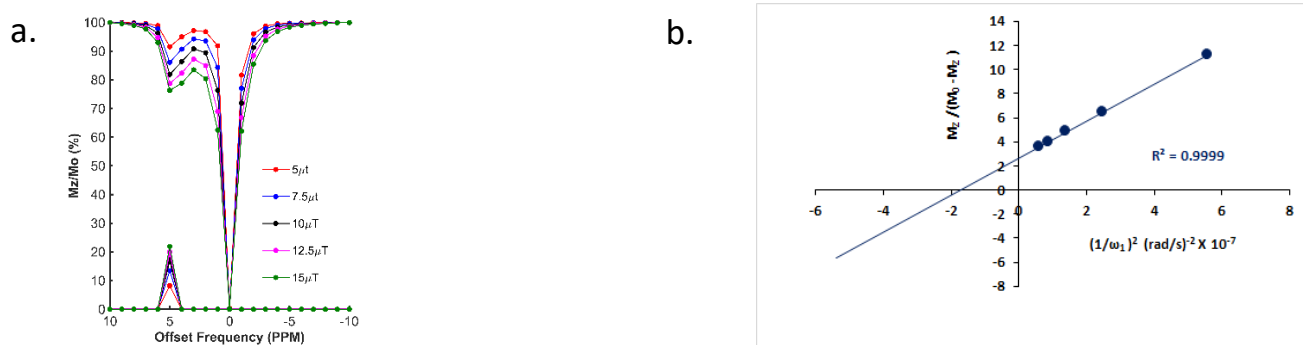

**Figure S38:** (a) Dependence of CEST percentage on saturation field strength ranging from 5  $\mu\text{T}$  to 15  $\mu\text{T}$  for N-(4-hydroxyphenyl) acetamide (**9**) at pH 8.1. (b) Omega plot for exchange rate measurement. The expected linear relationship of  $M_z/(M_0 - M_z)$  as a function of  $1/\omega_1^2$  (rad/sec) $^{-2} \times 10^{-7}$  was obtained when recorded at 16.3 T of 15 mM compound in 0.01M PBS buffer. RF saturation pulse was applied for 6 s ensuring complete saturation.

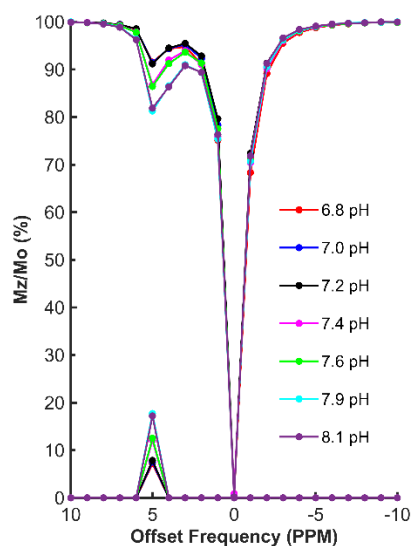

**Figure S39:** Dependence of CEST effect of N-(4-hydroxyphenyl) acetamide (**9**) on pH. Overlaid Z-spectra with pH ranging from 6.8 to 8.1. 5  $\mu\text{T}$  RF saturation was applied for 3s to obtain the z-spectra.
